# Supplementary material for: Socio-Ecological Factors Associated with Dengue Risk and Aedes aegypti Presence in the Galápagos Islands, Ecuador
Source: PubMed Central journal article supplement (PMC6427784; doi:10.3390/ijerph16050682), 2019-02-26
Supplement: ijerph-16-00682-s001.pdf [file ijerph-16-00682-s001.pdf]

**Table 1.** Competing top models for predictions of self-reported dengue (Prior Dengue).

|    | <b>Model</b>                                                                                                                                | <b>AICc</b> | <b>Weights</b> | <b><math>\Delta</math> AICc</b> |
|----|---------------------------------------------------------------------------------------------------------------------------------------------|-------------|----------------|---------------------------------|
| 1  | PriorDengue ~ 1 + pplrm + awarecases + visitbarriodaily + travisl + pipedinterrupt + problema + sewer + moreminwage                         | 70.04       | 0.07           | 0                               |
| 2  | PriorDengue ~ 1 + pplrm + awarecases + visitbarriodaily + travisl + pipedinterrupt + problema + noscreens + sewer + moreminwage             | 70.35       | 0.06           | 0.31                            |
| 3  | PriorDengue ~ 1 + pplrm + awarecases + visitbarriodaily + travisl + pipedinterrupt + problema + sewer + gt1hh + moreminwage                 | 70.44       | 0.06           | 0.40                            |
| 4  | PriorDengue ~ 1 + pplrm + awarecases + visitbarriodaily + travisl + pipedinterrupt + problema + moreminwage                                 | 70.75       | 0.05           | 0.71                            |
| 5  | PriorDengue ~ 1 + pplrm + awarecases + visitbarriodaily + storewater + travisl + pipedinterrupt + problema + sewer + moreminwage            | 70.98       | 0.05           | 0.95                            |
| 6  | PriorDengue ~ 1 + pplrm + awarecases + patioshade + visitbarriodaily + travisl + pipedinterrupt + problema + sewer + moreminwage            | 71.13       | 0.04           | 1.10                            |
| 7  | PriorDengue ~ 1 + pplrm + goodhouse + awarecases + visitbarriodaily + travisl + pipedinterrupt + problema + sewer + moreminwage             | 71.15       | 0.04           | 1.11                            |
| 8  | PriorDengue ~ 1 + pplrm + awarecases + severe + visitbarriodaily + travisl + pipedinterrupt + problema + sewer + moreminwage                | 71.19       | 0.04           | 1.15                            |
| 9  | PriorDengue ~ 1 + pplrm + badpatio + awarecases + visitbarriodaily + travisl + pipedinterrupt + problema + sewer + moreminwage              | 71.40       | 0.04           | 1.35                            |
| 10 | PriorDengue ~ 1 + pplrm + goodhouse + awarecases + visitbarriodaily + travisl + pipedinterrupt + problema + moreminwage                     | 71.50       | 0.04           | 1.46                            |
| 11 | PriorDengue ~ 1 + pplrm + awarecases + visitbarriodaily + travisl + pipedinterrupt + problema + sewer + oldhh + moreminwage                 | 71.73       | 0.03           | 1.69                            |
| 12 | PriorDengue ~ 1 + pplrm + goodhouse + awarecases + visitbarriodaily + travisl + pipedinterrupt + problema + moreminwage + secondedu         | 71.76       | 0.03           | 1.72                            |
| 13 | PriorDengue ~ 1 + pplrm + awarecases + visitbarriodaily + travcont + travisl + pipedinterrupt + problema + sewer + moreminwage              | 71.76       | 0.03           | 1.72                            |
| 14 | PriorDengue ~ 1 + pplrm + goodhouse + awarecases + visitbarriodaily + travisl + pipedinterrupt + problema + sewer + moreminwage + secondedu | 71.89       | 0.03           | 1.85                            |
| 15 | PriorDengue ~ 1 + pplrm + awarecases + visitbarriodaily + AC + travisl + pipedinterrupt + problema + sewer + moreminwage                    | 71.96       | 0.03           | 1.93                            |

**Table S2.** Competing top models for predictions of *Aedes aegypti* presence (AA).

|   | <b>Model</b>                                                                                                     | <b>AICc</b> | <b>Weights</b> | <b><math>\Delta</math>AICc</b> |
|---|------------------------------------------------------------------------------------------------------------------|-------------|----------------|--------------------------------|
| 1 | AA ~ 1 + mallas + repelente + tapar + cerrar + quimicos + severe + prevdifficult + AC + pipedout                 | 60.14       | 0.071          | 0                              |
| 2 | AA~ 1 + mallas + repelente + tapar + cerrar + quimicos + severe + prevdifficult + patioshade + AC + pipedout     | 60.78       | 0.05           | 0.64                           |
| 3 | AA~ 1 + mallas + repelente + tapar + quimicos + severe + prevdifficult + AC + pipedout                           | 60.82       | 0.05           | 0.67                           |
| 4 | AA ~ 1 + mallas + tapar + cerrar + quimicos + severe + prevdifficult + AC + pipedout                             | 60.82       | 0.05           | 0.67                           |
| 5 | AA ~ 1 + mallas + repelente + tapar + cerrar + quimicos + eliminar.agua + severe + prevdifficult + AC + pipedout | 61.52       | 0.04           | 1.38                           |
| 6 | AA ~ 1 + mallas + repelente + tapar + cerrar + quimicos + badpatio + severe + prevdifficult + AC + pipedout      | 61.74       | 0.03           | 1.59                           |
| 7 | AA ~ 1 + mallas + repelente + tapar + cerrar + quimicos + goodhouse + severe + prevdifficult + AC + pipedout     | 61.76       | 0.03           | 1.61                           |
| 8 | AA~ 1 + mallas + repelente + tapar + cerrar + quimicos + badhouse + severe + prevdifficult + AC + pipedout       | 61.95       | 0.03           | 1.81                           |
| 9 | AA ~ 1 + mallas + repelente + tapar + cerrar + quimicos + severe + prevdifficult + AC                            | 62.12       | 0.03           | 1.98                           |
